# Supplementary material
Source: Springer Nature journal article supplement (https://www.springermedizin.de/resource/supplementary/13005_2006_81_MOESM1_ESM.pdf/9626220)

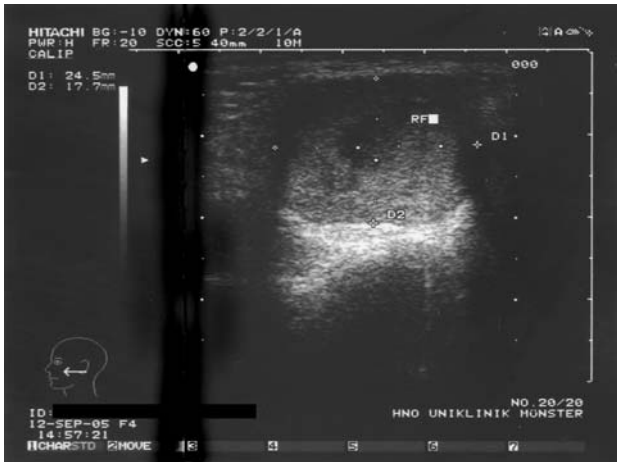

Ultrasound image axial

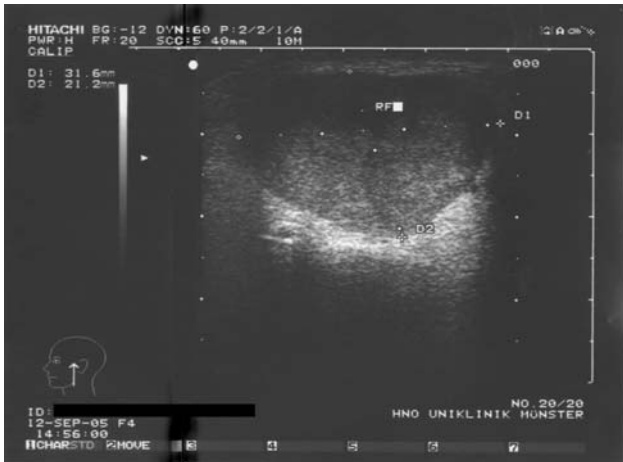

Ultrasound image transversal

Supplement: MOESM1 [file 9626220]
